# Supplementary material for: Evidence from comprehensive independent validation studies for smooth pursuit dysfunction as a sensorimotor biomarker for psychosis
Source: Sci Rep. 2024 Jun 15;14:13859. doi: 10.1038/s41598-024-64487-6 (PMC11180169; doi:10.1038/s41598-024-64487-6)
Supplement: Supplementary file 1 — Supplementary Information. [file 41598_2024_64487_MOESM1_ESM.docx]

**Supplementary Material - Evidence from comprehensive independent validation studies for smooth pursuit dysfunction as a sensorimotor biomarker for psychosis**

Inga Meyhoefer1,2,3, Andreas Sprenger4, David Derad4, Dominik Grotegerd1, Ramona Leenings1, Elisabeth J. Leehr1, Fabian Breuer1, Marian Surmann1, Karen Rolfes1, Volker Arolt1,2, Georg Romer5, Markus Lappe2,6, Johanna Rehder6, Nikolaos Koutsouleris7,8,9, Stefan Borgwardt10,11, Frauke Schultze-Lutter3,12,13, Eva Meisenzahl3, Tilo T. J. Kircher14, Sarah S. Keedy15, Jeffrey R. Bishop16, Elena I. Ivleva17, Jennifer E. McDowell18, James L. Reilly19, Scot Kristian Hill20, Godfrey D. Pearlson21, Carol A. Tamminga17, Matcheri S. Keshavan22, Elliot S. Gershon15, Brett A. Clementz18, John A. Sweeney23,24, Tim Hahn1, Udo Dannlowski1, and Rebekka Lencer1,2,10,*

1 Institute for Translational Psychiatry, University of Muenster, Germany

2 Otto-Creutzfeldt Center for Cognitive and Behavioral Neuroscience, University of Muenster, Germany

3 Department of Psychiatry and Psychotherapy, Medical Faculty, Heinrich-Heine University,

Duesseldorf/LVR, Germany

4 Department of Neurology, University of Luebeck, Germany

5 Department of Child Adolescence Psychiatry and Psychotherapy, University of Muenster,

Germany

6 Institute of Psychology, University of Muenster, Germany

7 Department of Psychiatry and Psychotherapy, Ludwig-Maximilian University Munich,

Germany

8 Institute of Psychiatry, Psychology and Neuroscience, King’s College London

9 Max-Planck-Institute of Psychiatry Munich, Germany

10 Department of Psychiatry and Psychotherapy, University of Luebeck, Germany

11 Department of Psychiatry, Psychiatric University Hospital, University of Basel, Switzerland

12 Department of Psychology, Faculty of Psychology, Airlangga University, Surabaya,

Indonesia

13 University Hospital of Child and Adolescent Psychiatry and Psychotherapy, University of

Bern, Switzerland

14 Department of Psychiatry and Psychotherapy, Philipps-University Marburg, Germany

15 Department of Psychiatry and Behavioral Neuroscience, University of Chicago, USA

16 Department of Experimental and Clinical Pharmacology and Department of Psychiatry and

Behavioral Sciences, University of Minnesota, Minneapolis, USA

17 Department of Psychiatry, The University of Texas Southwestern Medical Center, Dallas, TX, USA

18 Departments of Psychology and Neuroscience, Bio-Imaging Research Center, University of Georgia,

Athens, GA, USA

19 Department of Psychiatry and Behavioral Sciences, Northwestern University Feinberg School of Medicine,

Chicago, IL, USA

20 Department of Psychology, Rosalind Franklin University of Medicine and Science, Chicago, IL, USA

21 Departments of Psychiatry and Neuroscience, Yale School of Medicine, and Olin Research Center,

Institute of Living/Hartford Hospital, Hartford, CT, USA

22 Department of Psychiatry, Harvard Medical School, Beth Israel Deaconess Medical Center, Boston,

MA, USA

23 Huaxi MR Research Center (HMRRC), Department of Radiology, West China Hospital of

Sichuan University, Chengdu, China

24 Department of Psychiatry and Behavioral Neuroscience, University of Cincinnati College of

Medicine, Cincinnati, USA

*Rebekka Lencer, MD

Institute for Translational Psychiatry, University of Muenster

Albert Schweitzer Campus 1, Build. A9a

48149 Muenster

Phone: +49 172 429 2225, Email: lencer@uni-muenster.de


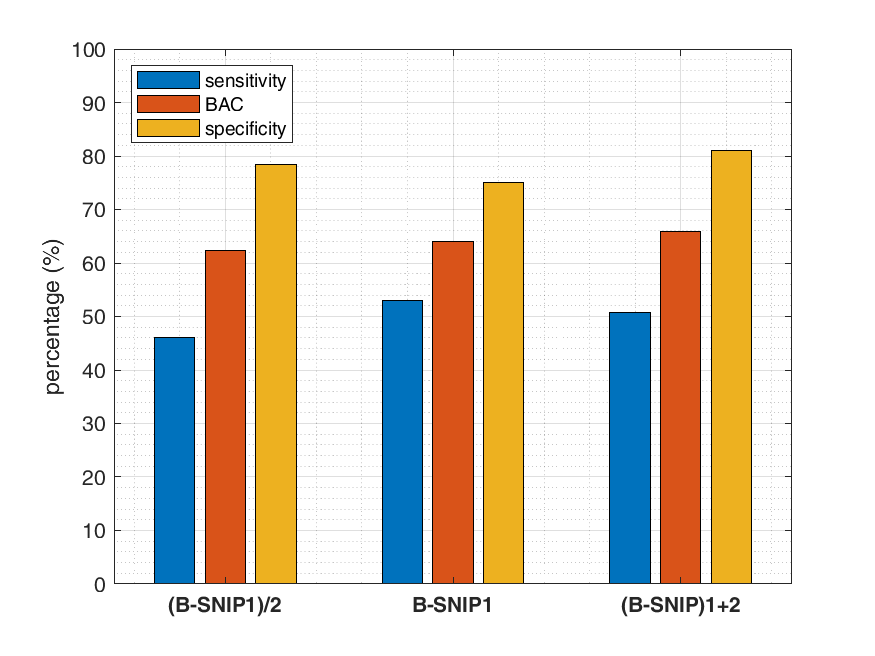


#

**Fig. S1.** Dependency of model parameters from sample size.

Figure displays the effect of sample size on model performance (therefore, models were trained and internally validated in half of the B-SNIP1 [(B-SNIP)/2)] and in the combined B-SNIP1 and B-SNIP2 [(B-SNIP)1+2)] samples). BAC=Balanced accuracy.

|  | **Original scores** | | **Converted scores** | |
| --- | --- | --- | --- | --- |
|  | **SANS** | **SAPS** | **PANSS negative** | **PANSS positive** |
| Controls | 0.64 (1.93) | 0.12 (0.56) | 7.34 (0.65) | 11.22 (0.14) |
| Psychosis Probands | 18.12 (17.82) | 8.65 (12.86) | 13.21 (5.99) | 13.43 (3.33) |
| MDwoP | 11.20 (12.84) | 0.60 (1.39) | 10.89 (4.32) | 11.34 (0.36) |
| BPwoP | 11.28 (12.42) | 1.08 (2.91) | 10.91 (4.18) | 11.47 (0.75) |

**Table S1.** Psychosis symptoms (conversion from SANS/SAPS to PANSS scores for the FOR2107 study)

**Abbreviations:** FOR2107=DFG Forschergruppe 2107, MDwoP=probands with major depression without psychosis, BPwoP=bipolar probands without psychosis, SAPS=Scale for Assessment of Positive Symptoms and SANS=Scale for Assessment of Negative symptoms 1, PANSS=Positive And Negative Syndrome Scale 2. Conversion was estimated using the computations from Van Erp and colleagues 3 using SANS and SAPS composite/total scores.

| **Study** | **Total scorea** | **No depression/**  **remission** | **Mild depression** | **Moderate depression** | **Severe depression** |
| --- | --- | --- | --- | --- | --- |
| **B-SNIP1** |  |  |  |  |  |
| Controls |  |  |  |  |  |
| Psychosis probands | 10.74 (9.32) | 50.6% | 26.7% | 21.2% | 1.5% |
| **B-SNIP2** |  |  |  |  |  |
| Controls |  |  |  |  |  |
| Psychosis probands | 11.41 (10.24) | 47.0% | 28.9% | 20.6% | 3.6% |
| **PARDIP** |  |  |  |  |  |
| Controls |  |  |  |  |  |
| BPwP | 17.86 (12.46) | 34.7% | 16.3% | 40.8% | 8.2% |
| BPwoP | 17.15 (11.05) | 23.5% | 35.3% | 35.3% | 5.9% |
| **FOR2107** |  |  |  |  |  |
| Controls | 2.65 (3.42) |  |  |  |  |
| Psychosis Probands | 12.11 (8.07) |  |  |  |  |
| MDwoP | 11.95 (9.65) |  |  |  |  |
| BPwoP | 11.88 (13.45) |  |  |  |  |
| **PRONIA** |  |  |  |  |  |
| Controls | 3.07 (2.56) | 100% |  |  |  |
| ROD | 22.71 (11.36) | 21.4% | 21.4% | 28.6% | 28.6% |
| CHR | 31.06 (8.98) | 0.0% | 0.0% | 43.8% | 56.3% |
| ROP | 28.10 (16.39) | 20.0% | 0.0% | 30.0% | 50.0% |

**Table S2.** Depression (gradation estimation)

**Abbreviations:** B-SNIP=Bipolar-Schizophrenia Network on Intermediate Phenotypes, PARDIP= Psychosis and Affective Research Domains and Intermediate Phenotypes, BPwP=bipolar probands with psychosis, BPwoP=bipolar probands without psychosis, FOR2107=DFG Forschergruppe 2107, MDwoP=probands with major depression without psychosis, PRONIA=Personalised Prognostic Tools for Early Psychosis Management, ROD=recent-onset depression probands, CHR=clinical-high-risk- for psychosis probands, ROP=recent-onset-psychosis probands. **Further explanations: a**Depressive symptoms were estimated using the following measures: B-SNIP1, B-SNIP2, PARDIP=Montgomery–Åsberg Depression Rating Scale (MADRS; 4); FOR2107=Original Beck Depression Inventory, 1978 version 5; PRONIA=Beck Depression Inventory-II (BDI-II; 6). Severity gradation was calculated according to MADRS: 7. BDI: 6. No severity gradation could be computed for the original Beck Depression Inventory used in the FOR 2107 sample.

|  | **Classifier** | **Specified parameters** | **Balancing method** | **PCA components** |
| --- | --- | --- | --- | --- |
| **Overall best configuration** | Support vector machine | C=1, linear kernel | Undersampling majority class | 3 |
| **Outer fold 1** | Support vector machine | C=0.5, rbf kernel | SMOTE | disabled |
| **Outer fold 2** | Support vector machine | C=0.1, linear kernel | Undersampling majority class | 2 |
| **Outer fold 3** | Support vector machine | C=1, linear kernel | Undersampling majority class | 3 |

**Table S3.** Specifications of the best machine learning model

|  | **TP** | **FP** | **TN** | **FN** | **BAC** | **Sensitivity** | **Specificity** | **PPV** | **NPV** | **P-value** |
| --- | --- | --- | --- | --- | --- | --- | --- | --- | --- | --- |
| **B-SNIP1** | | | | | | | | | | |
| Fold 1 | 122 | 32 | 72 | 101 | 61.97 | 54.71 | 69.23 | 79.22 | 41.62 |  |
| Fold 2 | 124 | 22 | 67 | 113 | 63.80 | 52.32 | 75.28 | 84.93 | 37.22 |  |
| Fold 3 | 111 | 22 | 90 | 103 | 66.11 | 51.87 | 80.36 | 83.46 | 46.63 |  |
| **Mean** |  |  |  |  | **63.96** | **52.97** | **74.96** | **82.54** | **41.82** | **<.001** |
| **B-SNIP2 (external validation-1)** | | | | | | | | | | |
| Psychosis probands vs. Controls | 373 | 75 | 214 | 293 | **65.03** | 56.01 | 74.05 | 83.26 | 42.21 |  |
| **PARDIP (external validation-2)** | | | | | | | | | | |
| BPwP vs. Controls | 30 | 26 | 44 | 14 | **65.52** | 68.18 | 62.86 | 53.57 | 75.86 |  |
| **FOR2107 (external validation-3)** | | | | | | | | | | |
| Psychosis probands vs. Controls | 22 | 19 | 53 | 29 | **58.37** | 43.14 | 73.61 | 53.66 | 64.63 |  |

**Table S4.** Model results for the comparison of chronic psychosis probands vs. controls for B-SNIP1 and external validation samples B-SNIP2, PARDIP, and FOR2107

**Abbreviations:** B-SNIP=Bipolar-Schizophrenia Network on Intermediate Phenotypes, TP=true positive findings, FP=false positive findings, TN=true negative findings, FN=false negative findings, BAC=balanced accuracy score, PPV=positive predictive value, NPV=negative predictive value, FOR2107=DFG Forschergruppe 2107.
**Further Explanations:** P-value is indicated for BAC score as this metric was used to identify the best performing model.

|  | **TP** | **FP** | **TN** | **FN** | **BAC** | **Sensitivity** | **Specificity** | **PPV** | **NPV** |
| --- | --- | --- | --- | --- | --- | --- | --- | --- | --- |
| **schizophrenia probands vs. schizoaffective probands** | | | | | | | | | |
| Fold 1 | 47 | 19 | 33 | 49 | 56.21 | 48.96 | 63.46 | 71.21 | 40.24 |
| Fold 2 | 45 | 26 | 34 | 43 | 53.90 | 51.14 | 56.67 | 63.38 | 44.16 |
| Fold 3 | 37 | 33 | 33 | 44 | 47.84 | 45.68 | 50.00 | 52.86 | 42.86 |
| **Mean** |  |  |  |  | **52.65** | **48.59** | **56.71** | **62.48** | **42.42** |
| **schizophrenia probands vs. bipolar probands** | | | | | | | | | |
| Fold 1 | 39 | 23 | 50 | 54 | 55.21 | 41.94 | 68.49 | 62.90 | 48.08 |
| Fold 2 | 37 | 35 | 43 | 50 | 48.83 | 42.53 | 55.13 | 51.39 | 46.24 |
| Fold 3 | 27 | 20 | 60 | 58 | 53.38 | 31.76 | 75.00 | 57.45 | 50.85 |
| **Mean** |  |  |  |  | **52.48** | **38.74** | **66.21** | **57.25** | **48.39** |
| **schizoaffective probands vs. bipolar probands** | | | | | | | | | |
| Fold 1 | 29 | 46 | 36 | 26 | 48.31 | 52.73 | 43.90 | 38.67 | 58.06 |
| Fold 2 | 21 | 33 | 46 | 36 | 47.54 | 36.84 | 58.23 | 38.89 | 56.10 |
| Fold 3 | 50 | 43 | 27 | 16 | 57.16 | 75.76 | 38.57 | 53.76 | 62.79 |
| **Mean** |  |  |  |  | **51.00** | **55.11** | **46.90** | **43.77** | **58.98** |

**Table S5.** Model results for individual psychosis proband groups in the B-SNIP1 sample

**Abbreviations:** B-SNIP=Bipolar-Schizophrenia Network on Intermediate Phenotypes, TP=true positive findings, FP=false positive findings, TN=true negative findings, FN=false negative findings, BAC=balanced accuracy score, PPV=positive predictive value, NPV=negative predictive value.
**Further Explanations:** P-value is indicated for BAC score as this metric was used to identify the best performing mode.

|  | **TP** | **FP** | **TN** | **FN** | **BAC** | **Sensitivity** | **Specificity** | **PPV** | **NPV** |
| --- | --- | --- | --- | --- | --- | --- | --- | --- | --- |
| Fold 1 | 53 | 17 | 38 | 55 | 59.08 | 49.07 | 69.09 | 75.71 | 40.86 |
| Fold 2 | 50 | 7 | 46 | 60 | 66.12 | 45.45 | 86.79 | 87.72 | 43.40 |
| Fold 3 | 52 | 9 | 35 | 67 | 61.62 | 43.70 | 79.55 | 85.25 | 34.31 |
| **Mean** |  |  |  |  | **62.28** | **46.08** | **78.48** | **82.89** | **39.52** |

**Table S6.** Model results for 50% of the B-SNIP1 sample

**Abbreviations:** B-SNIP=Bipolar-Schizophrenia Network on Intermediate Phenotypes, TP=true positive findings, FP=false positive findings, TN=true negative findings, FN=false negative findings, BAC=balanced accuracy score, PPV=positive predictive value, NPV=negative predictive value.
**Further Explanations:** P-value is indicated for BAC score as this metric was used to identify the best performing model.

|  | **TP** | **FP** | **TN** | **FN** | **BAC** | **Sensitivity** | **Specificity** | **PPV** | **NPV** |
| --- | --- | --- | --- | --- | --- | --- | --- | --- | --- |
| Fold 1 | 246 | 43 | 154 | 223 | 65.31 | 52.45 | 78.17 | 85.12 | 40.85 |
| Fold 2 | 210 | 30 | 163 | 263 | 64.43 | 44.40 | 84.46 | 87.50 | 38.26 |
| Fold 3 | 255 | 41 | 166 | 204 | 67.87 | 55.56 | 80.19 | 86.15 | 44.86 |
| **Mean** |  |  |  |  | **65.87** | **50.80** | **80.94** | **86.26** | **41.33** |

**Table S7.** Model results for combined B-SNIP1 and B-SNIP2 samples

**Abbreviations:** B-SNIP=Bipolar-Schizophrenia Network on Intermediate Phenotypes, TP=true positive findings, FP=false positive findings, TN=true negative findings, FN=false negative findings, BAC=balanced accuracy score, PPV=positive predictive value, NPV=negative predictive value.
**Further Explanations:** P-value is indicated for BAC score as this metric was used to identify the best performing model.

| **Study** | **Group** | **SPEM variables** | | | |
| --- | --- | --- | --- | --- | --- |
|  |  | Predictive maintenance gain | Early maintenance gain | Initial eye acceleration | Eye latency |
| **B-SNIP1** | Psychosis probands | -.05 (n.s.) | -.11 (p=.008) | -.08 (n.s.) | .08 (n.s.) |
| **B-SNIP2** | Psychosis probands | -.08 (n.s.) | -.09 (p=.03) | .02 (n.s.) | .03 (n.s.) |
| **PARDIP** | BPwP | .11 (n.s.) | .06 (n.s.) | -.05 (n.s.) | -.02 (n.s.) |
| **FOR2107** | Psychosis probands | -.05 (n.s.) | -.11 (n.s.) | -.05 (n.s.) | .17 (n.s.) |
| **PRONIA** | ROP | .07 (n.s.) | .33 (n.s.) | .20 (n.s.) | .07 (n.s.) |

**Table S8.** Correlations between SPEM variables and chlorpromazine equivalents

**Abbreviations:** B-SNIP=Bipolar-Schizophrenia Network on Intermediate Phenotypes**,** PARDIP= Psychosis and Affective Research Domains and Intermediate Phenotypes, BPwP=bipolar probands with psychosis, BPwoP=bipolar probands without psychosis**,** PRONIA=Personalised Prognostic Tools for Early Psychosis Management, ROD=recent-onset depression probands, CHR=clinical-high-risk- for psychosis probands, ROP=recent-onset-psychosis probands, n.s.=non-significant (p values were shown Bonferroni-Holm corrected).

| **Group** | **SPEM variables** | | | |
| --- | --- | --- | --- | --- |
|  | Predictive maintenance gain | Early maintenance gain | Initial eye acceleration | Eye latency |
| **Psychosis probands** | .08 (p=.006) | .13 (p=.004) | .11 (p=.004) | -.04 (n.s.) |
| **Healthy controls** | .10 (n.s.) | .09 (n.s.) | .08 (n.s.) | -.05 (n.s.) |

**Table S9.** Correlations between SPEM variables and Wide Range Achievement Test 4 in the B-SNIP1 sample

**Abbreviations:** B-SNIP=Bipolar-Schizophrenia Network on Intermediate Phenotypes**,** n.s.=non-significant (p values were shown Bonferroni-Holm corrected).

| **Group** | **SPEM variables** | | | |
| --- | --- | --- | --- | --- |
|  | Predictive maintenance gain | Early maintenance gain | Initial eye acceleration | Eye latency |
| **Psychosis probands** | .14 (p=.004) | .19 (p=.004) | .15 (p=.004) | -.06 (p=.01) |
| **Healthy controls** | .04 (n.s.) | .09 (n.s.) | .05 (n.s.) | -.02 (n.s.) |

# Table S10. Correlations between SPEM variables and z-scores of the Brief assessment of cognition in schizophrenia in the B-SNIP1 sample

**Abbreviations:** B-SNIP=Bipolar-Schizophrenia Network on Intermediate Phenotypes**,** n.s.=non-significant (p values were shown Bonferroni-Holm corrected).

| **SPEM variable** | **ANOVA** | **Post-hoc (Bonferroni-corrected alpha-level)** |
| --- | --- | --- |
| Predictive maintenance gain | F(4,751)=2.44, p=.05 | all comparisons were non-significant (p≥.20) |
| Early maintenance gain | F(4,750)=2.66, p=.03 | B-SNIP1 > FOR2107 p=.02, all other comparisons were non-significant (p≥.48) |
| Initial eye acceleration | F(4,747)=7.51, p<.001 | B-SNIP1 < FOR2107 p<.001  B-SNIP1 < PRONIA p=.01  B-SNIP2 < FOR2107 p=.001  B-SNIP2 < PRONIA p=.02  PARDIP < FOR2107 p<.001  PARDIP < PRONIA p=.005  all other comparisons were non-significant (p=1.00) |
| Eye latency | F(4,748)=6.74, p<.001 | B-SNIP1 > FOR2107 p=.02  B-SNIP2 > FOR2107 p<.001  PARDIP > FOR2107 p<.001  all other comparisons were non-significant (p≥.11) |

# Table S11. Differences between laboratories/recording devices in SPEM variables of healthy controls

|  | **TP** | **FP** | **TN** | **FN** | **BAC** | **Sensitivity** | **Specificity** | **PPV** | **NPV** |
| --- | --- | --- | --- | --- | --- | --- | --- | --- | --- |
| Fold 1 | 94 | 21 | 83 | 129 | 60.98 | 42.15 | 79.81 | 81.74 | 39.15 |
| Fold 2 | 138 | 30 | 59 | 99 | 62.26 | 58.23 | 66.29 | 82.14 | 37.34 |
| Fold 3 | 103 | 26 | 86 | 111 | 62.46 | 48.10 | 76.79 | 79.84 | 43.65 |
| **Mean** |  |  |  |  | **61.90** | **49.50** | **74.30** | **81.24** | **40.05** |

**Table S12.** Model results B-SNIP1 sample (comparison psychosis probands vs. controls, predictors: predictive maintenance gain, early maintenance gain)

**Abbreviations:** B-SNIP=Bipolar-Schizophrenia Network on Intermediate Phenotypes, TP=true positive findings, FP=false positive findings, TN=true negative findings, FN=false negative findings, BAC=balanced accuracy score, PPV=positive predictive value, NPV=negative predictive value.
**Further Explanations:** P-value is indicated for BAC score as this metric was used to identify the best performing model.

**References**

1. Andreasen, N. C. The Scale for the Assessment of Negative Symptoms (SANS): Conceptual and Theoretical Foundations. *Br. J. Psychiatry* **155**, 49–52 (1989).

2. Kay, S. R., Fiszbein, A. & Opler, L. A. The positive and negative syndrome scale (PANSS) for schizophrenia. *Schizophr. Bull.* **13**, 261–276 (1987).

3. Van Erp, T. G. M. *et al.* Converting positive and negative symptom scores between PANSS and SAPS/SANS. *Schizophr. Res.* **152**, 289–294 (2014).

4. Montgomery, S. A. & Åsberg, M. A new depression scale designed to be sensitive to change. *Br. J. Psychiatry* **134**, 382–389 (1979).

5. Beck, A. T. & Steer, R. A. Internal consistencies of the original and revised Beck Depression Inventory. *J. Clin. Psychol.* **40**, 1365–1367 (1984).

6. Beck, A. T., Steer, R. A. & Brown, G. K. *Manual for Beck Depression Inventory-II*. (San Antonio, TX: Psychological Corporation, 1996).

7. Müller, M. J., Szegedi, A., Wetzel, H. & Benkert, O. Moderate and severe depression: Gradations for the Montgomery–Åsberg Depression Rating Scale. *J. Affect. Disord.* **60**, 137–140 (2000).
